# Supplementary material
Source: PubMed Central journal article supplement (PMC1885591)

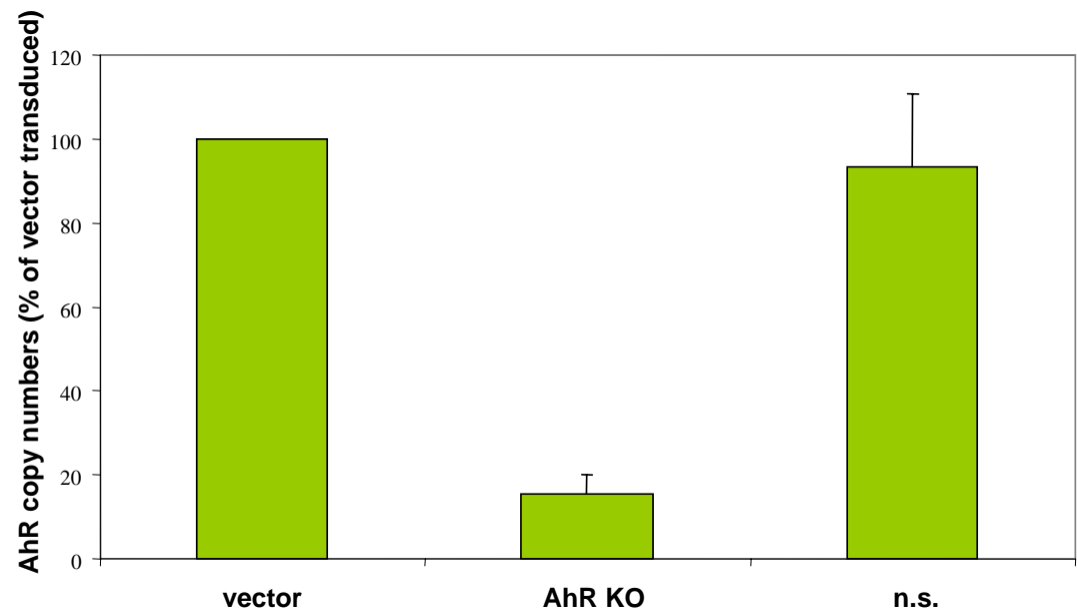

Supplement: pnas_0701764104_1.pdf [file pnas_0701764104_1.pdf]

**A**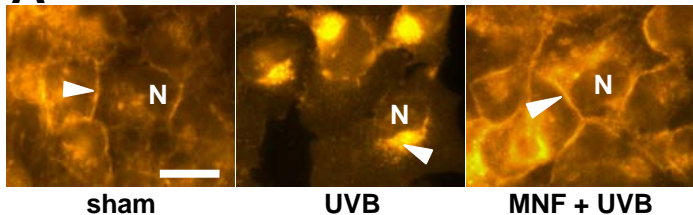**B**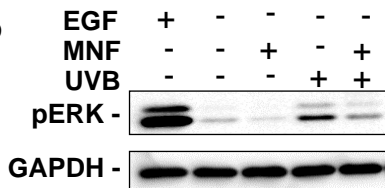**C**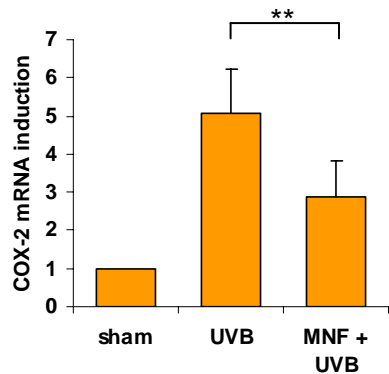**D**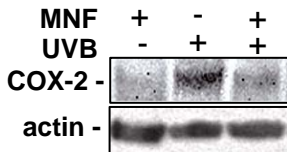

Supplement: pnas_0701764104_2.pdf [file pnas_0701764104_2.pdf]

**A**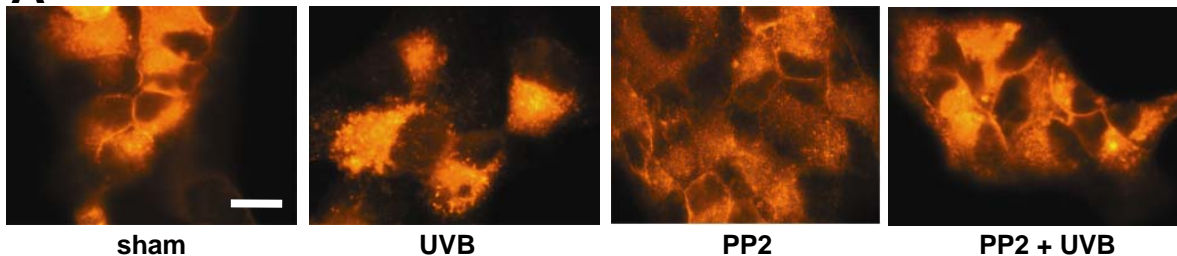**B**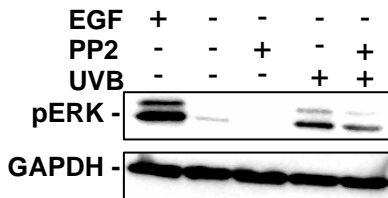**C**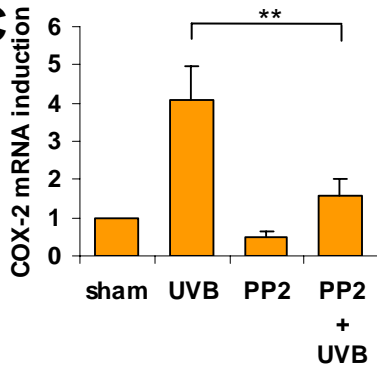**D**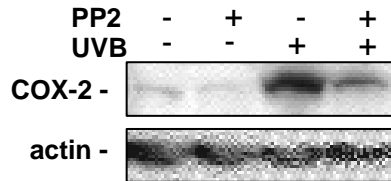

Supplement: pnas_0701764104_3.pdf [file pnas_0701764104_3.pdf]

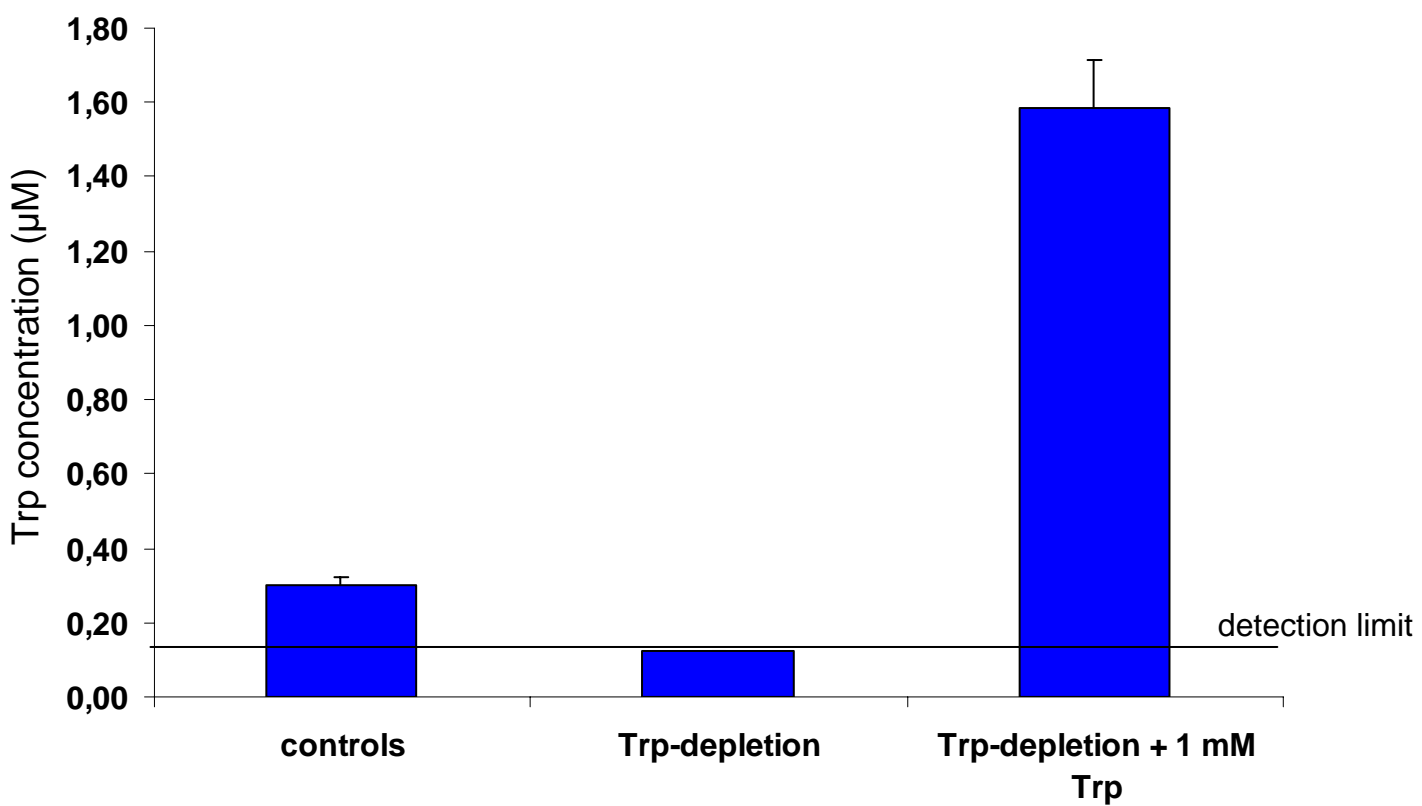

Supplement: pnas_0701764104_4.pdf [file pnas_0701764104_4.pdf]

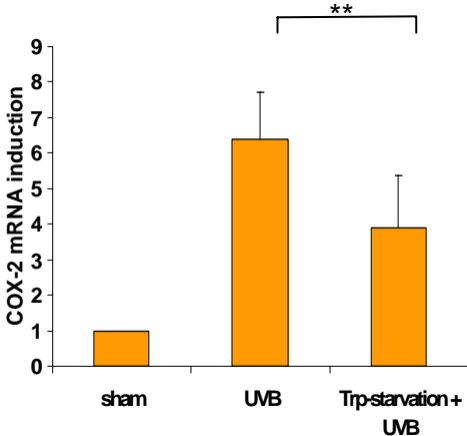

Supplement: pnas_0701764104_5.pdf [file pnas_0701764104_5.pdf]

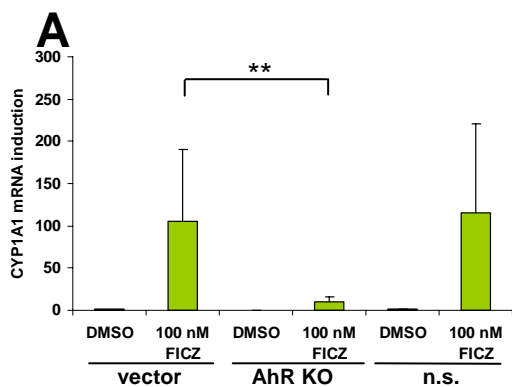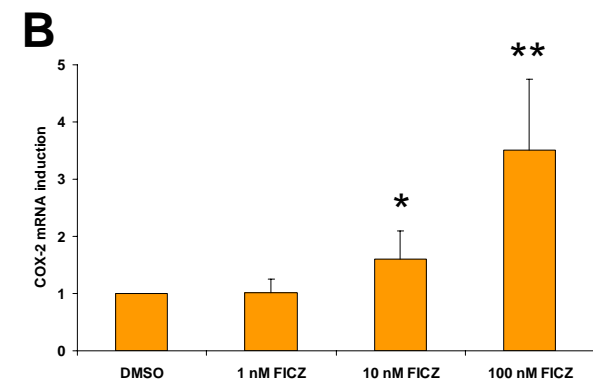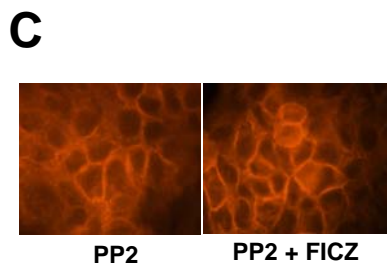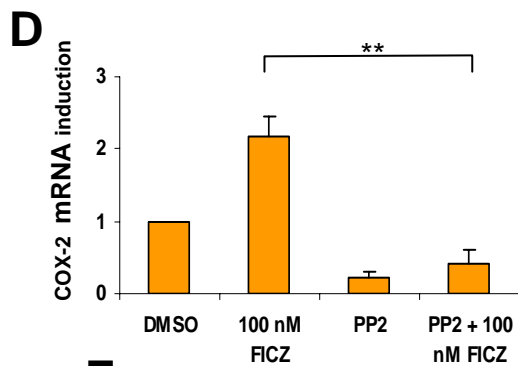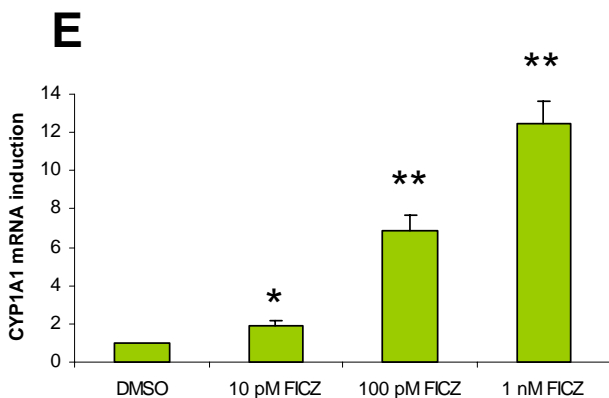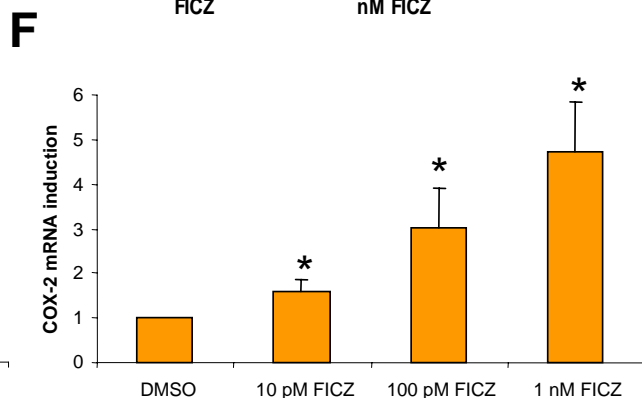

Supplement: pnas_0701764104_6.pdf [file pnas_0701764104_6.pdf]
